# Supplementary material for: Enhanced photoresponse and fast charge transfer: three-dimensional macroporous g-C3N4/GO-TiO2 nanostructure for hydrogen evolution
Source: Royal Society of Chemistry journal article supplement (doi:10.1039/d0ta07178a), 2020-01-01
Supplement: d0ta07178a1.pdf [file d0ta07178a1.pdf]

Supplementary information

**Enhanced Photoresponse and Fast Charge Transfer: Three-Dimensional Macroporous g-C<sub>3</sub>N<sub>4</sub>/GO-TiO<sub>2</sub> Nanostructure for Hydrogen Evolution**

Wei Li,<sup>\*a</sup> Qiong Ma,<sup>b</sup> Xiao Wang,<sup>a</sup> Xiao-shan Chu,<sup>a</sup> Fei Wang,<sup>a</sup> Xue-chuan Wang,<sup>\*a,b</sup> Chuan-yi

Wang<sup>\*c</sup>

<sup>a</sup>College of Chemistry and Chemical Engineering, Key Laboratory of Auxiliary Chemistry and Technology for Chemical Industry, Ministry of Education, Shaanxi Key Laboratory of Chemical Additives for Industry, Shaanxi University of Science & Technology, Xi'an, Shaanxi 710021, China

<sup>b</sup>College of Bioresources Chemical and Materials Engineering, Shaanxi University of Science & Technology, Xi'an, Shaanxi 710021, China

<sup>c</sup>School of Environmental Sciences and Engineering, Shaanxi University of Science & Technology, Xi'an, Shaanxi 710021, China

**Corresponding authors:**

Wei Li, liweihg@sust.edu.cn

Xue-chuan Wang, wangxc@sust.edu.cn

Chuan-yi Wang, wangchuanyi@sust.edu.cn

## 1. Methods

### 1.1 Materials.

Graphite powder ( $\leq 20 \mu\text{m}$ , 99.90 %), concentrated sulfuric acid ( $\text{H}_2\text{SO}_4$ , 98.0 %), sodium nitrate ( $\text{NaNO}_3$ , A.R.), potassium permanganate ( $\text{KMnO}_4$ , A.R.), hydrogen peroxide ( $\text{H}_2\text{O}_2$  30 %), hydrochloric acid ( $\text{HCl}$ , 37 %), melamine ( $\text{C}_3\text{H}_6\text{N}_6$ , C.R.),  $\text{NH}_4\cdot\text{OH}$  (25%, A.R.), tetraethoxysilane (TEOS, A.R.), sodium carbonate ( $\text{Na}_2\text{CO}_3$ , A.R.), butyl titanate (TBOT, A.R.), absolute ethanol (EA, A.R.), potassium ferricyanide ( $\text{K}_3[\text{Fe}(\text{CN})_6]$ , A.R.), sodium sulfate ( $\text{Na}_2\text{SO}_4$ , A.R.), Nafion D-250 dispersion and triethanolamine (TEOA, A.R.) were purchased from Aladdin (Shanghai, China). Ultrapure water is produced by laboratory ultrapure water machine.

### 1.2 Synthesis of $\text{SiO}_2$ NPs.

The  $\text{SiO}_2$  microspheres were synthesized by a typical sol-gel method. Concretely, 8 mL TEOS was added dropwise to the mixed solution of 200 mL ethanol and 100 mL deionized water, then 5 mL  $\text{NH}_4\cdot\text{OH}$  was added to the mixed solution under mechanical agitation at 300 rpm. After being stirred for 6 h at 30 °C, the product was separated by centrifugation and washed to neutral with ethanol and deionized water. Finally, the  $\text{SiO}_2$  microspheres with particle size of 100 nm were obtained after drying for 12 h in a freeze-dryer.

### 1.3 Preparation of anatase $\text{TiO}_2$ NPs.

The anatase  $\text{TiO}_2$  NPs were prepared by hydrolysis-calcining method. 28 mL of TBOT was added

dropwise to 400 mL deionized water and stirred continuously for 2 h at 60 °C, then the as-prepared white gel particles were rinsed with deionized water for several times and dried overnight at 60 °C. Then, the dried powder was calcined for 4 h at 550 °C (10 °C/min) under N<sub>2</sub> atmosphere to obtain the anatase TiO<sub>2</sub> NPs.

#### **1.4 Preparation of 3D CNG.**

3D CNG composite was prepared by calcination method. 1.5 g of melamine and certain amount of GO (0.0050 g/0.0075 g/0.0100 g) were dissolved and dispersed in 50 mL deionized water at 90 °C and kept for 1~2 h to remove the water. Then the dried mixture was calcined for 4 h at 550 °C (10 °C/min) under N<sub>2</sub> atmosphere, and the resulting products were marked as 3D CNG- $\alpha$  ( $\alpha = 1$  (0.0050 g), 2 (0.0075 g) and 3 (0.0100 g)).

#### **1.5 Electrochemical measurements.**

Platinum electrode and Ag/AgCl electrode were used as the counter electrode and reference electrode, and ITO glass (15 mm × 15 mm) coated with tested sample was used as the working electrode. Then, a three-electrode system was built in a quartz cell with 0.2 M Na<sub>2</sub>SO<sub>4</sub> solution as electrolyte. The preparation method of working electrode is as follows: 10 mg tested sample was ultrasonically dispersed in 1 mL absolute ethanol with 1  $\mu$ L Nafion solution, then 500  $\mu$ L above uniform dispersion was coated on the conductive surface of ITO glass and naturally dried at room temperature. In testing process, 300 W Xenon lamp (PLSSXE300) with 420 nm filter was used as the

light source. Linear sweep voltammetry (LSV), Tafel plots (TP), Mott-Schottky curves (M-S) and transient photocurrent densities of the samples were measured by using 0.2 M Na<sub>2</sub>SO<sub>4</sub> solution as electrolyte.

In impedance testing process, the electrolyte was the K<sub>3</sub>[Fe(CN)<sub>6</sub>] solution (0.02 M). The offset potential, amplitude, initial frequency, final frequency, logarithmic current, step/decade and frequency step were 0 V, 0.01 V, 100000 Hz, 1 Hz, 100 mA, 12 and 0, respectively.

In amperometric i-t curves testing process, the initial potential, sample interval, quiet time and sensitivity were set as -0.1 V, 0.1 s, 1 s and 10 μA, respectively.

In the Tafel plots testing process, the initial potential, final potential, final potential hold time, scan rate, sweep segments, sample interval, quiet time and sensitivity were -1 V, 2 V, 0 s, 0.1 V/s, 1, 0.001 V, 1 s and 100 μA, respectively.

In linear sweep voltammetry (LSV) curves in dark testing process, the initial potential, final potential, scan rate, sample interval, quiet time and sensitivity were -1 V, 0.2 V, 0.01 V/s, 0.001 V, 1s and 100 μA, respectively. Under interrupted illumination, the above parameters were -0.4 V, 2 V, 0.02 V/s, 0.001 V, 1s and 10 μA, respectively.

In the Mott-Schottky (M-S) plots at different frequencies (1 kHz, 1.5 kHz and 2 kHz) testing process, the initial potential, final potential, increment potential, amplitude, cycles, quiet time and sensitivity were 0 V, 1 V, 0.01 V, 0.01 V, 10, 0 s and 1 mA, respectively.

## 1.6 Equations of average hydrogen evolution rate.

$$V_{H_2} = 485.11 A_s \quad (1)$$

In this formula,  $V_{H_2}$  and  $A_s$  are the volume mass of the generated hydrogen and chromatographic peak area of the generated hydrogen samples, respectively. According to mass of the catalysts ( $m_{cat}$ ) and the volume of standard hydrogen ( $V_m$ ) during the experiment, the final formula can be calculated as was shown as below:

$$R_e = \frac{A_s}{485.11 m_{cat} \cdot V_m} \quad (2)$$

## 2. Results and Discussion

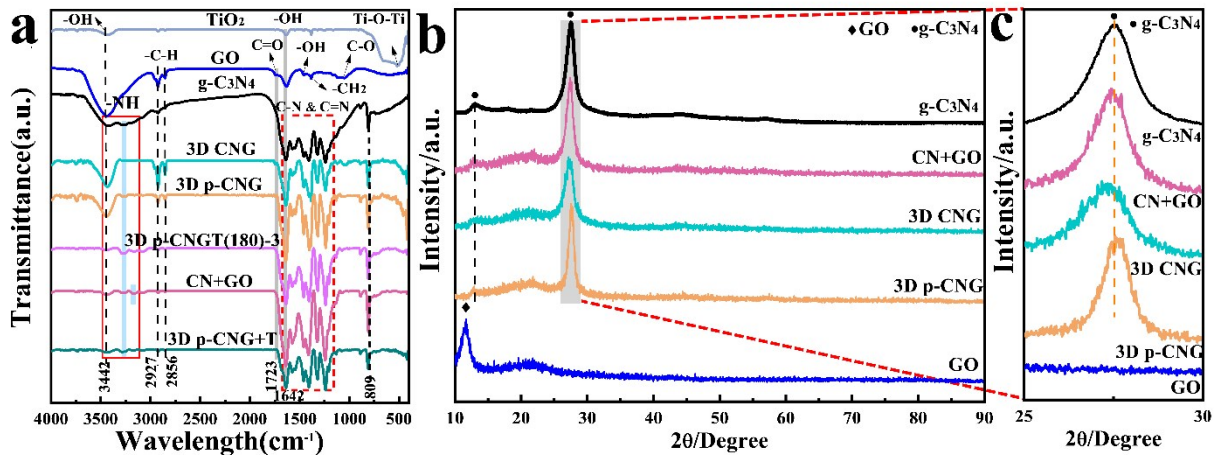

Fig.S1(a) FTIR spectra of the samples. (b) XRD patterns of the g-C<sub>3</sub>N<sub>4</sub>, CN+GO, 3D CNG, 3D p-CNG and GO. (c) Partial magnification of panel (b) at  $2\theta = 25 \sim 30^\circ$ .

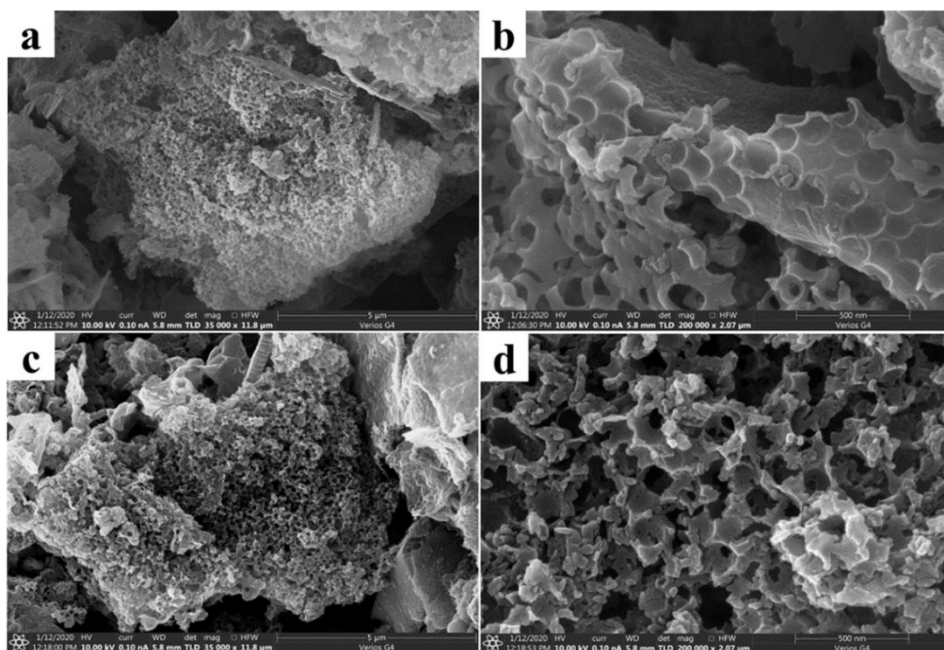

Fig.S2 SEM images of 3D p-CNG skeleton (a,b) and 3D p-CNGT(180)-3 catalyst (c,d).

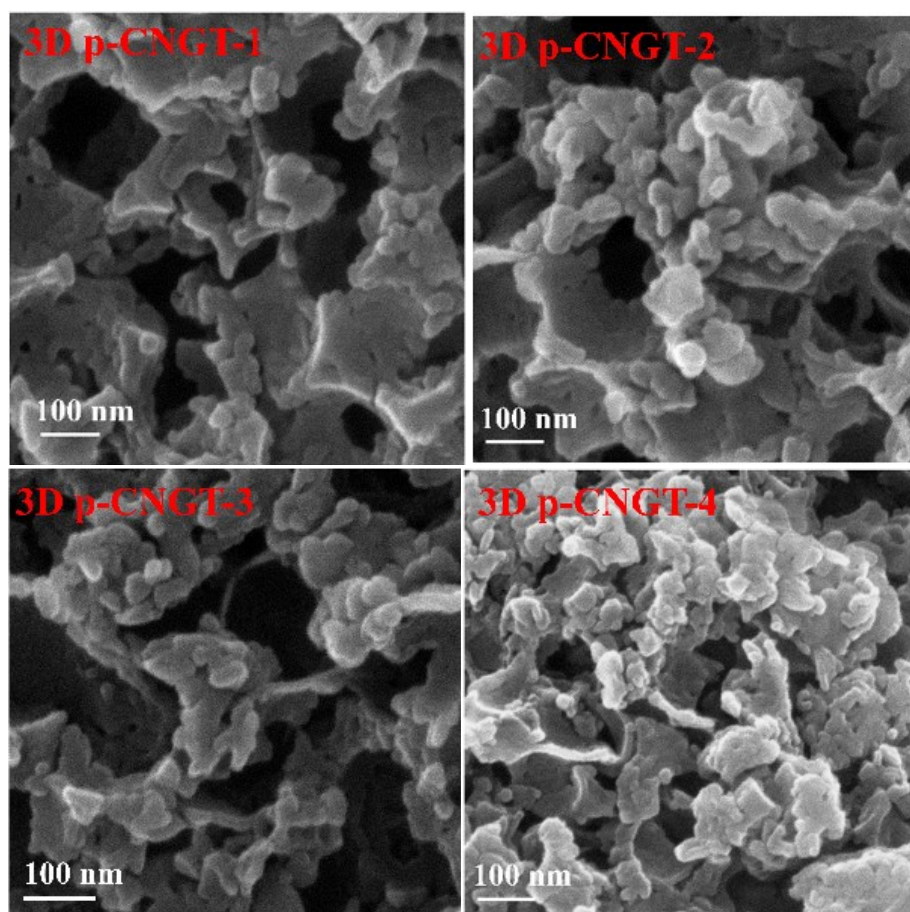

Fig.S3 SEM images of 3D p-CNGT catalysts with different amount of TiO<sub>2</sub> NPs. The synthetic temperature is 180 °C.

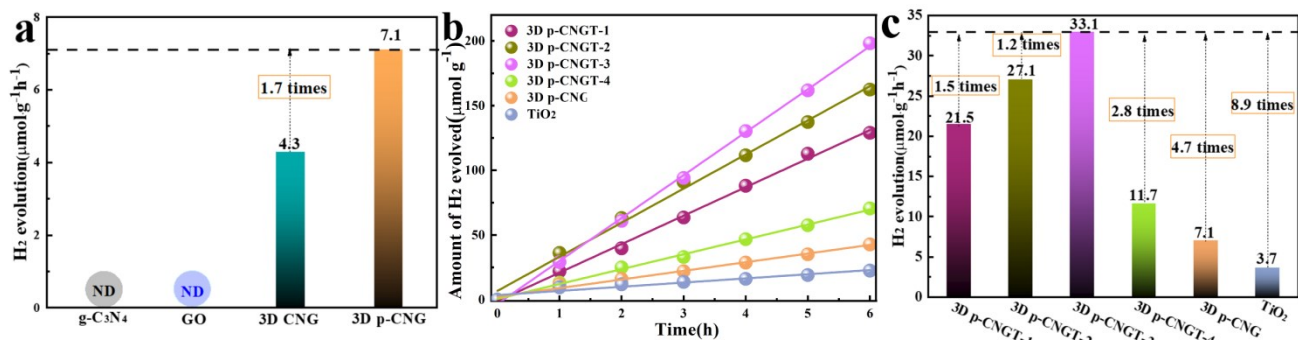

**Fig.S4 (a)** HER rates of g-C<sub>3</sub>N<sub>4</sub>, GO, 3D CNG and 3D p-CNG under simulated solar light. **(b)**

Amounts of evolved H<sub>2</sub> and **(c)** HER rates on different catalysts.

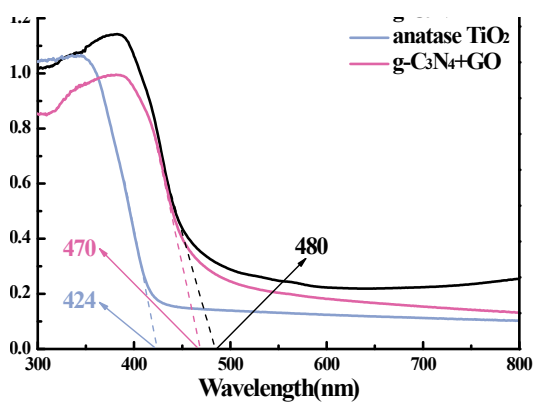

**Fig.S5** UV-vis absorption spectra of g-C<sub>3</sub>N<sub>4</sub>, anatase TiO<sub>2</sub> NPs and physically mixed g-C<sub>3</sub>N<sub>4</sub> and GO.
